# Supplementary material for: Controllable coverage of Bi2S3 quantum dots on one-dimensional TiO2 nanorod arrays by pulsed laser deposition technique for high photoelectrochemical properties
Source: Royal Society of Chemistry journal article supplement (doi:10.1039/c7nj00213k), 2017-01-01
Supplement: c7nj00213k1.pdf [file c7nj00213k1.pdf]

## Supporting Information

### **Controllable coverage of Bi<sub>2</sub>S<sub>3</sub> quantum dots on one-dimensional TiO<sub>2</sub> nanorod arrays by pulsed laser deposition technique for high photoelectrochemical properties**

Minmin Han<sup>a,b</sup>, Hongjian Guo<sup>a,b</sup>, Bo Li<sup>a</sup>, Junhong Jia<sup>a,\*</sup>, Wenzhen Wang<sup>a</sup>

<sup>a</sup> State Key Laboratory of Solid Lubrication, Lanzhou Institute of Chemical Physics,  
Chinese Academy of Sciences, Lanzhou, 730000, P. R. China.

<sup>b</sup> University of Chinese Academy of Sciences, Beijing, 100080, P. R. China.

---

\* Corresponding author. Tel./Fax: +86-931-4968611.  
E-mail address: jhjia@licp.cas.cn (J. Jia)

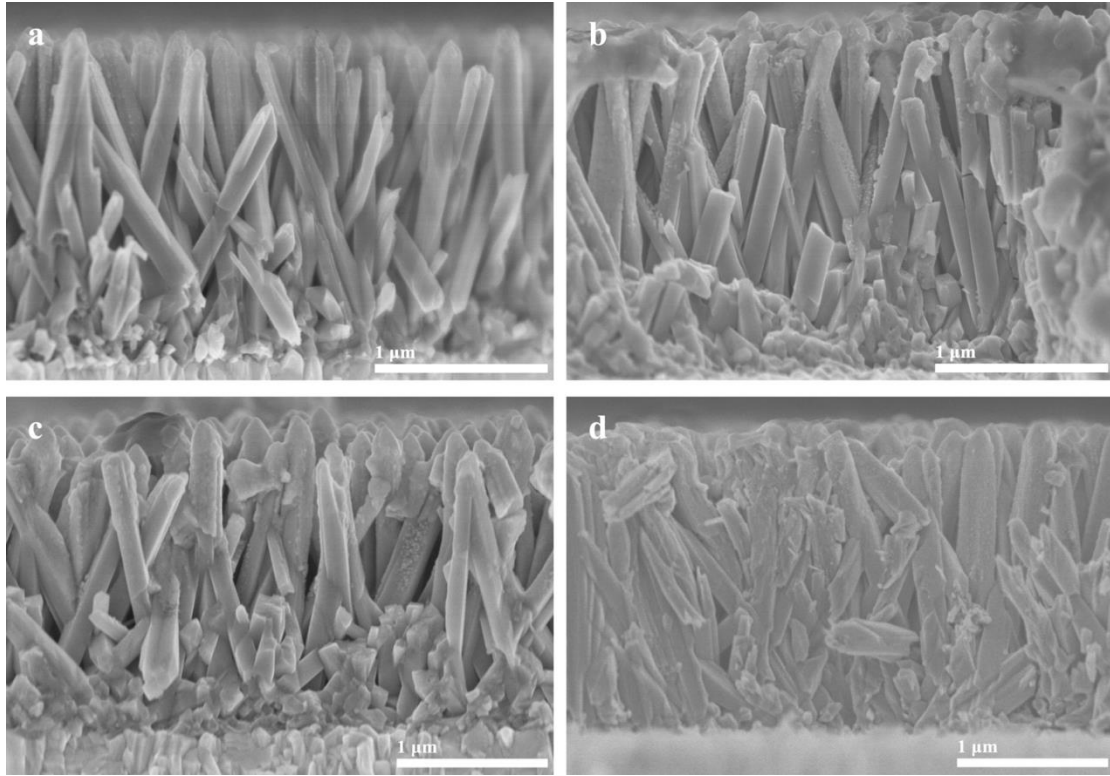

Fig. S1 Cross-section view FESEM images of (a) BS(900)/TiO<sub>2</sub>, (b) BS(1800)/TiO<sub>2</sub>, (c) BS(2700)/TiO<sub>2</sub> and (d) BS(3600)/TiO<sub>2</sub>.

Fig. S1 shows the cross-section view FESEM images of BS(*n*)/TiO<sub>2</sub> photoelectrode. As the laser ablation pulse (*n*) increases, the coverage of QDs on the nanorods increases. When the QDs are deposited with low value of *n*, there are few QDs on the surface of TiO<sub>2</sub> nanorods (Fig. S1a and b). With the increase of *n*, the size and quantity of QDs increases and the top of TiO<sub>2</sub> nanorods become domed particles (Fig. S1c). While further increasing the value of *n*, the nanorods thicken obviously and the porosity between nanorods decreases (Fig. S1d). This result is consistent with the SEM images of the surface for BS(*n*)/TiO<sub>2</sub> photoelectrodes in Fig. 1, which indicates that the coverage of QDs on the surface of nanorods is able to be adjusted by the PLD technique.

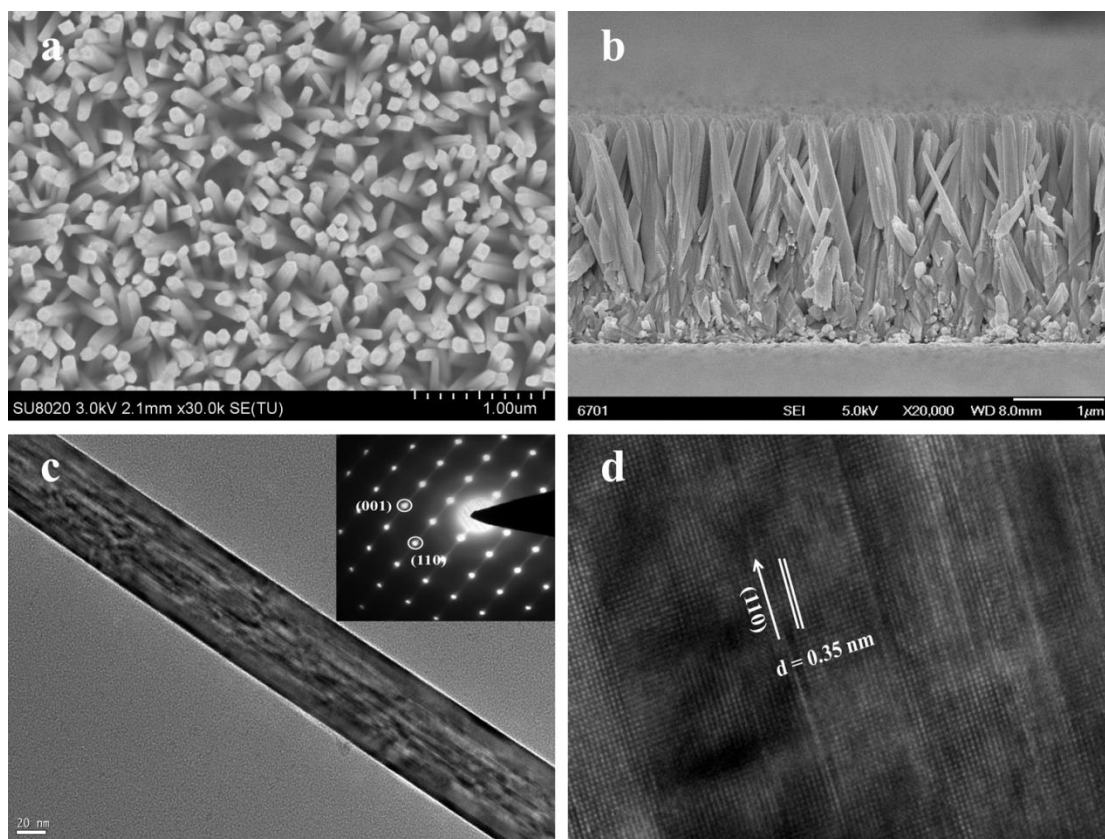

Fig. S2 (a) Top-view and (b) cross-section view FESEM images of  $\text{TiO}_2$  nanorod arrays. (c) TEM and (d) HRTEM images of  $\text{TiO}_2$  nanorod arrays, the inset in (c) shows the SAED pattern of  $\text{TiO}_2$  nanorod arrays.

Fig. S2a shows the top-view FESEM image of plain  $\text{TiO}_2$  nanorod arrays. With an obvious porosity between them,  $\text{TiO}_2$  nanorods grow uniformly all over the FTO substrate. From the cross-sectional view, it can be clearly seen that the  $\text{TiO}_2$  nanorods are vertically aligned and the length of  $\text{TiO}_2$  nanorods is about  $2\ \mu\text{m}$ . Moreover, the diameter of plain  $\text{TiO}_2$  nanorod is about  $110\ \text{nm}$  (Fig. S2c). The SAED pattern and the HRTEM image confirm the single-crystalline nature of  $\text{TiO}_2$  nanorods. The lattice spacing of  $0.35\ \text{nm}$  can be indexed to the (110) plane, which indicates that the nanorods grow along the (110) crystal plane with a preferred (001) orientation. The XRD spectrum presented in Figure 3a also confirms that the  $\text{TiO}_2$  nanorods are single

crystalline and can be classified as tetragonal rutile phase (JCPDS file no. 21-1276)

since all the diffraction peaks well match rutile phase.
